# Supplementary material
Source: Springer Nature journal article supplement (https://www.springermedizin.de/resource/supplementary/13099_2010_29_MOESM2_ESM.pdf/9665416)

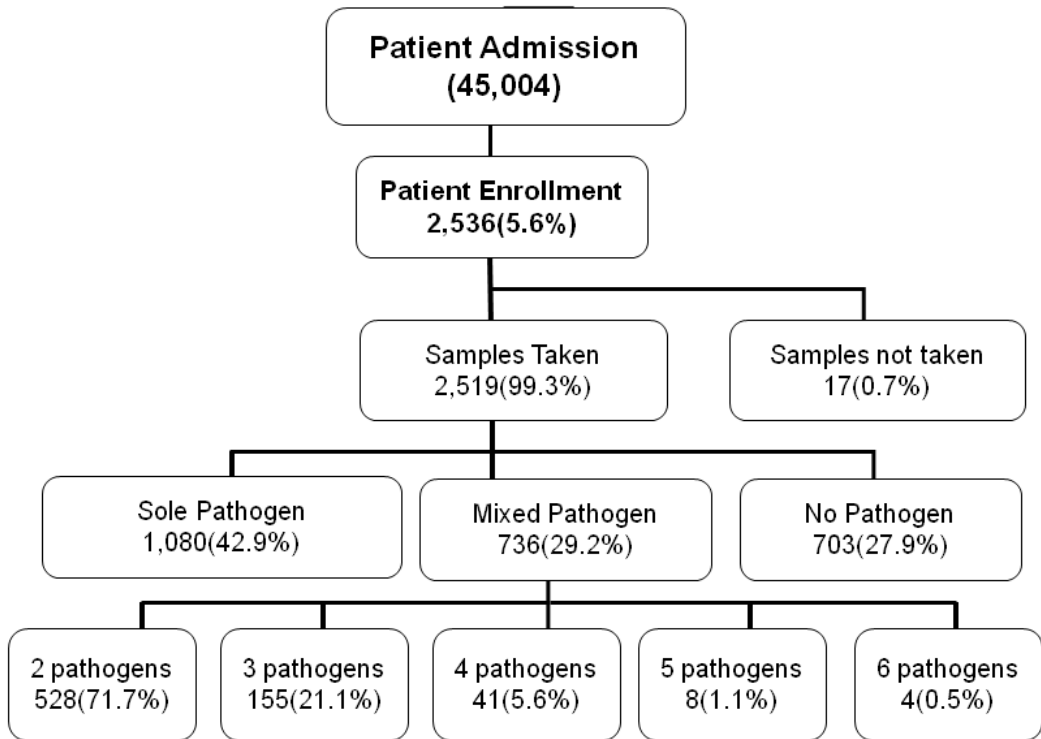

Supplement: MOESM2 [file 9665416]
